# Supplementary material for: Shear stress activates ATOH8 via autocrine VEGF promoting glycolysis dependent-survival of colorectal cancer cells in the circulation
Source: PubMed Central journal article supplement (PMC6993408; doi:10.1186/s13046-020-1533-0), 2020-01-30
Supplement: 13046_2020_1533_MOESM4_ESM.pdf [file 13046_2020_1533_MOESM4_ESM.pdf]

**Table S2. Demographics and Clinical Characteristics of 141 cases of CRC**

| Characteristic                | patients |      |                  |      |              |      | P value |
|-------------------------------|----------|------|------------------|------|--------------|------|---------|
|                               |          |      | Non-hypertension |      | Hypertension |      |         |
|                               | n=141    | %    | n=114            | %    | n=27         | %    |         |
| <b>Sex</b>                    |          |      |                  |      |              |      |         |
| male                          | 85       | 60.3 | 68               | 59.6 | 17           | 63.0 | 0.752   |
| female                        | 56       | 39.7 | 46               | 40.4 | 10           | 37.0 |         |
| <b>Age (years)</b>            |          |      |                  |      |              |      |         |
| ≤ 60                          | 93       | 34.0 | 80               | 70.2 | 13           | 51.9 | 0.030   |
| >60                           | 48       | 66.0 | 34               | 29.8 | 14           | 48.1 |         |
| <b>BMI index</b>              |          |      |                  |      |              |      |         |
| <18.5                         | 16       | 11.3 | 15               | 13.2 | 1            | 3.7  | 0.338   |
| 18.5-24.9                     | 107      | 75.9 | 84               | 73.7 | 23           | 85.2 |         |
| ≥25                           | 18       | 12.8 | 15               | 13.2 | 3            | 11.1 |         |
| <b>Tumour site</b>            |          |      |                  |      |              |      |         |
| left colon                    | 47       | 33.3 | 37               | 32.5 | 10           | 37.0 | 0.528   |
| right colon                   | 39       | 27.7 | 30               | 26.3 | 9            | 33.3 |         |
| rectum                        | 55       | 39.0 | 47               | 41.2 | 8            | 29.6 |         |
| <b>Tumour differentiation</b> |          |      |                  |      |              |      |         |
| Poorly                        | 16       | 11.3 | 13               | 11.4 | 3            | 11.1 | 0.827   |
| Moderately                    | 88       | 62.4 | 70               | 61.4 | 18           | 66.7 |         |
| Well                          | 19       | 13.5 | 15               | 13.2 | 4            | 14.8 |         |
| -                             | 18       | 12.8 | 16               | 14.0 | 2            | 7.4  |         |
| <b>TNM stage</b>              |          |      |                  |      |              |      |         |
| I                             | 1        | 0.7  | 1                | 0.9  | 0            | 0.0  | 0.926   |
| II                            | 17       | 12.1 | 13               | 11.4 | 4            | 14.8 |         |
| III                           | 22       | 15.6 | 18               | 15.8 | 4            | 14.8 |         |
| IV                            | 101      | 71.6 | 82               | 71.9 | 19           | 70.4 |         |
| <b>Lymph node metastasis</b>  |          |      |                  |      |              |      |         |
| positive                      | 72       | 51.1 | 58               | 50.9 | 14           | 51.9 | 0.927   |
| negative                      | 69       | 48.9 | 56               | 49.1 | 13           | 48.1 |         |
| <b>Liver metastasis</b>       |          |      |                  |      |              |      |         |
| positive                      | 68       | 48.2 | 56               | 49.1 | 12           | 44.4 | 0.662   |
| negative                      | 73       | 51.8 | 58               | 50.9 | 15           | 55.6 |         |
| <b>Lung metastasis</b>        |          |      |                  |      |              |      |         |
| positive                      | 39       | 27.7 | 30               | 26.3 | 9            | 33.3 | 0.464   |

|                                 |     |      |    |      |    |      |       |
|---------------------------------|-----|------|----|------|----|------|-------|
| negative                        | 102 | 72.3 | 84 | 73.7 | 18 | 66.7 |       |
| <b>Organ metastasis(Others)</b> |     |      |    |      |    |      |       |
| positive                        | 23  | 16.3 | 19 | 16.7 | 4  | 14.8 | 0.815 |
| negative                        | 118 | 83.7 | 95 | 83.3 | 23 | 85.2 |       |
| <b>Gene mutation</b>            |     |      |    |      |    |      |       |
| KRAS                            | 22  | 15.6 | 17 | 14.9 | 5  | 18.5 | 0.100 |
| BRAF                            | 3   | 2.1  | 1  | 0.9  | 2  | 7.4  |       |
| other                           | 2   | 1.4  | 1  | 0.9  | 1  | 3.7  |       |
| -                               | 114 | 80.9 | 95 | 83.3 | 19 | 70.4 |       |

---

Note. The correlation was examined using Chi-square test.
