# Supplementary material for: Shear stress activates ATOH8 via autocrine VEGF promoting glycolysis dependent-survival of colorectal cancer cells in the circulation
Source: Springer Nature journal article supplement (doi:10.1186/s13046-020-1533-0), 2020-01-30
Supplement: MOESM2 [file 17611456]

**Table S1 Real-Time Polymerase Chain Reaction Primers**

| Name          |                 | Sequence                   |
|---------------|-----------------|----------------------------|
| <i>ATOH8</i>  | Forward (5'-3') | CAGGTGCCGTGCTACTCATA       |
|               | Reverse (5'-3') | AGTCACTCCTTGCGCTTCTT       |
| <i>GAPDH</i>  | Forward (5'-3') | ACCCAGAAGACTGTGGATGG       |
|               | Reverse (5'-3') | TCTAGACGGCAGGTCAGGTC       |
| <i>HK2</i>    | Forward (5'-3') | GAGCCACCACTCACCTACT        |
|               | Reverse (5'-3') | CCAGGCATTCGGCAATGTG        |
| <i>BAX</i>    | Forward (5'-3') | CCCGAGAGGTCTTTTCCGAG       |
|               | Reverse (5'-3') | CCAGCCCATGATGGTTCTGAT      |
| <i>BCL2</i>   | Forward (5'-3') | GGTGGGGTCATGTGTGTGG        |
|               | Reverse (5'-3') | CGG TTCAGG TACTC sAGTCATCC |
| <i>MMP9</i>   | Forward (5'-3') | GGGACGCAGACATCGTCATC       |
|               | Reverse (5'-3') | TCGTCATCGTCGAAATGGGC       |
| <i>MMP1</i>   | Forward (5'-3') | GGGGCTTTGATGTACCCTAGC      |
|               | Reverse (5'-3') | TGTCACACGCTTTTGGGGTTT      |
| <i>CD80</i>   | Forward (5'-3') | AAACTCGCATCTACTGGCAA       |
|               | Reverse (5'-3') | GGTTCTTGTACTCGGGCCATA      |
| <i>TIMP1</i>  | Forward (5'-3') | CTTCTGCAATCCGACCTCGT       |
|               | Reverse (5'-3') | ACGCTGGTATAAGGTGGTCTG      |
| <i>IL11</i>   | Forward (5'-3') | CGAGCGGACCTACTGTCCTA       |
|               | Reverse (5'-3') | GCCCAGTCAAGTGTCAGGTG       |
| <i>IL10</i>   | Forward (5'-3') | GATGTCAAAC TCACTCATGGCT    |
|               | Reverse (5'-3') | CGAGCGGACCTACTGTCCTA       |
| <i>IFNG</i>   | Forward (5'-3') | TCGGTAACTGACTTGAATGTCCA    |
|               | Reverse (5'-3') | TCGCTTCCCTGTTTTAGCTGC      |
| <i>ANG</i>    | Forward (5'-3') | CTGGGCGTTTTGTTGTTGGTC      |
|               | Reverse (5'-3') | GGTTTGGCATCATAGTGCTGG      |
| <i>TGF-β3</i> | Forward (5'-3') | ACAACACCTGAACCCAGAG        |

|                    |                 |                          |
|--------------------|-----------------|--------------------------|
|                    | Reverse (5'-3') | ACTGCAGTGAGCAAGCTGA      |
| <i>TNF</i>         | Forward (5'-3') | AAGCCTGTAGCCCATGTTGTAGC  |
|                    | Reverse (5'-3') | GAAGACCCCTCCCAGATAGATG   |
| <i>VEGFR2</i>      | Forward (5'-3') | GGCCCAATAATCAGAGTGGCA    |
|                    | Reverse (5'-3') | CCAGTGTCATTTCCGATCACTTT  |
| <i>GLUT1</i>       | Forward (5'-3') | GCCAGAAGGAGTCAGGTTCAA    |
|                    | Reverse (5'-3') | TCCTCGGAAAGGAGTTAGATCC   |
| <i>LDHA</i>        | Forward (5'-3') | ATGGCAACTCTAAAGGATCAGC   |
|                    | Reverse (5'-3') | CCAACCCCAACAACCTGTAATCT  |
| <i>VEGF</i>        | Forward (5'-3') | AGGGCAGAATCATCACGAAGT    |
|                    | Reverse (5'-3') | AGGGTCTCGATTGGATGGCA     |
| <i>E-Cadherin</i>  | Forward (5'-3') | CGAGAGCTACACGTTACGG      |
|                    | Reverse (5'-3') | GGGTGTCGAGGGAAAAATAGG    |
| <i>N-Cadherin</i>  | Forward (5'-3') | TGCGGTACAGTGTAACCTGGG    |
|                    | Reverse (5'-3') | GAAACCGGGCTATCTGCTCG     |
| <i>Vimentin</i>    | Forward (5'-3') | GACGCCATCAACACCGAGTT     |
|                    | Reverse (5'-3') | CTTTGTCGTTGGTTAGCTGGT    |
| <i>Laminin5</i>    | Forward (5'-3') | GACTGCCAACAGTGCCAAC      |
|                    | Reverse (5'-3') | CCACCCTGATAGGTGCCAT      |
| <i>Fibronectin</i> | Forward (5'-3') | CGGTGGCTGTCAGTCAAAG      |
|                    | Reverse (5'-3') | AAACCTCGGCTTCCTCCATAA    |
| <i>HK2-p1</i>      | Forward (5'-3') | TAAGTGGTCAGATGCACGGT     |
|                    | Reverse (5'-3') | CCCTCACAGCCAGTCAATCC     |
| <i>HK2-p2</i>      | Forward (5'-3') | GTTGAGTTCAGCTTTGGACATGTT |
|                    | Reverse (5'-3') | AGAAACTAACTTCCTAGCCCCATG |
| <i>HK2-p3</i>      | Forward (5'-3') | GAGCTCAATTCTGTGTGGAGT    |
|                    | Reverse (5'-3') | ACTTCTTGAGAACTATGTACCCTT |

---
