# Supplementary material for: Shear stress activates ATOH8 via autocrine VEGF promoting glycolysis dependent-survival of colorectal cancer cells in the circulation
Source: J Exp Clin Cancer Res. 2020 Jan 30;39:25. doi: 10.1186/s13046-020-1533-0 (PMC6993408; doi:10.1186/s13046-020-1533-0)
Supplement: Supplementary file 7 — Additional file 7: Table S5. List of cytokines and cytokine receptor genes in GSEA. [file 13046_2020_1533_MOESM7_ESM.xls]

## Sheet: KEGG_CYTOKINE_CYTOKINE_RECEPTOR
KEGG_CYTOKINE_CYTOKINE_RECEPTOR_INTERACTION
1	AMH
2	BMP2
3	BMP7
4	CCL1
5	CCL11
6	CCL13
7	CCL14
8	CCL15
9	CCL16
10	CCL17
11	CCL18
12	CCL19
13	CCL2
14	CCL20
15	CCL21
16	CCL22
17	CCL23
18	CCL24
19	CCL25
20	CCL26
21	CCL27
22	CCL28
23	CCL3
24	CCL3L1
25	CCL3L3
26	CCL4
27	CCL4L1
28	CCL4L2
29	CCL5
30	CCL7
31	CCL8
32	CD27
33	CD70
34	CLCF1
35	CNTF
36	CRLF2
37	CSF1
38	CSF2
39	CSF3
40	CTF1
41	CX3CL1
42	CXCL1
43	CXCL10
44	CXCL11
45	CXCL12
46	CXCL13
47	CXCL14
48	CXCL16
49	CXCL2
50	CXCL3
51	CXCL5
52	CXCL6
53	CXCL9
54	EDA
55	EGF
56	EPO
57	FAS
58	FASLG
59	FIGF
60	FLT1
61	FLT3
62	FLT3LG
63	FLT4
64	GDF5
65	GH1
66	GH2
67	HGF
68	IFNA1
69	IFNA10
70	IFNA13
71	IFNA14
72	IFNA16
73	IFNA17
74	IFNA2
75	IFNA21
76	IFNA4
77	IFNA5
78	IFNA6
79	IFNA7
80	IFNA8
81	IFNB1
82	IFNE
83	IFNG
84	IFNK
85	IFNW1
86	IL10
87	IL11
88	IL12A
89	IL12B
90	IL13
91	IL14
92	IL15
93	IL16
94	IL17A
95	IL17B
96	IL18
97	IL19
98	IL1A
99	IL1B
100	IL2
101	IL20
102	IL21
103	IL22
104	IL23A
105	IL24
106	IL25
107	IL26
108	IL28A
109	IL28B
110	IL29
111	IL3
112	IL4
113	IL5
114	IL6
115	IL6ST
116	IL7
117	IL8
118	IL9
119	INHBA
120	INHBB
121	INHBC
122	INHBE
123	KIT
124	KITLG
125	LEP
126	LIF
127	LOC652799
128	LTA
129	LTB
130	MET
131	MPL
132	OSM
133	PDGFA
134	PDGFB
135	PDGFC
136	PF4
137	PF4V1
138	PLEKHO2
139	PPBP
140	PPBPL1
141	PRL
142	RELT
143	TGFB1
144	TGFB2
145	TGFB3
146	TNF
147	TNFRSF10A
148	TNFRSF10B
149	TNFRSF10C
150	TNFRSF10D
151	TNFRSF11A
152	TNFRSF21
153	TNFSF10
154	TNFSF11
155	TNFSF12
156	TNFSF13
157	TNFSF13B
158	TNFSF14
159	TNFSF15
160	TNFSF18
161	TNFSF4
162	TNFSF8
163	TNFSF9
164	TPO
165	TSLP
166	VEGFA
167	VEGFB
168	VEGFC
169	XCL1
170	XCL2

## Sheet: GSE13712
	Gene name	Gene ID	adj.P.Val	P.Value	logFC
1	CD27	206150_at	0.315	0.0019185	2.04899
2	GDF5	206614_at	0.521	0.0167531	1.92325
3	IL11	206924_at	0.489	0.0128503	4.41111
4	IL25	220971_at	0.424	0.00673472	1.79818
5	IL26	221111_at	0.444	0.00849202	2.91073
6	VEGFA	210512_s_at	0.536	0.0203915	1.59914

## Sheet: GSE52211
	Gene name	Gene ID	adj.P.Val	P.Value	logFC
1	CCL26	4560	0.5315	0.0187658	2.07305
2	FAS	38595	0.1951	0.00080142	3.02032
3	IL11	15354	0.5366	0.0195739	3.02241
4	KITLG	14343	0.5044	0.0153642	2.08896
5	TGFB3	16295	0.2161	0.00112454	2.14763
6	TNFRSF10A	16793	0.4939	0.0135702	1.99825
7	VEGFA	10384	0.4645	0.0105521	1.78401
